# Supplementary material for: TRAL 2.0: Tandem Repeat Detection With Circular Profile Hidden Markov Models and Evolutionary Aligner
Source: PubMed Central journal article supplement (PMC9581039; doi:10.3389/fbinf.2021.691865), 2021-06-25
Supplement: Image1.pdf [file Image1.pdf]

# Supplementary Material

## 1 SUPPLEMENTARY DATA

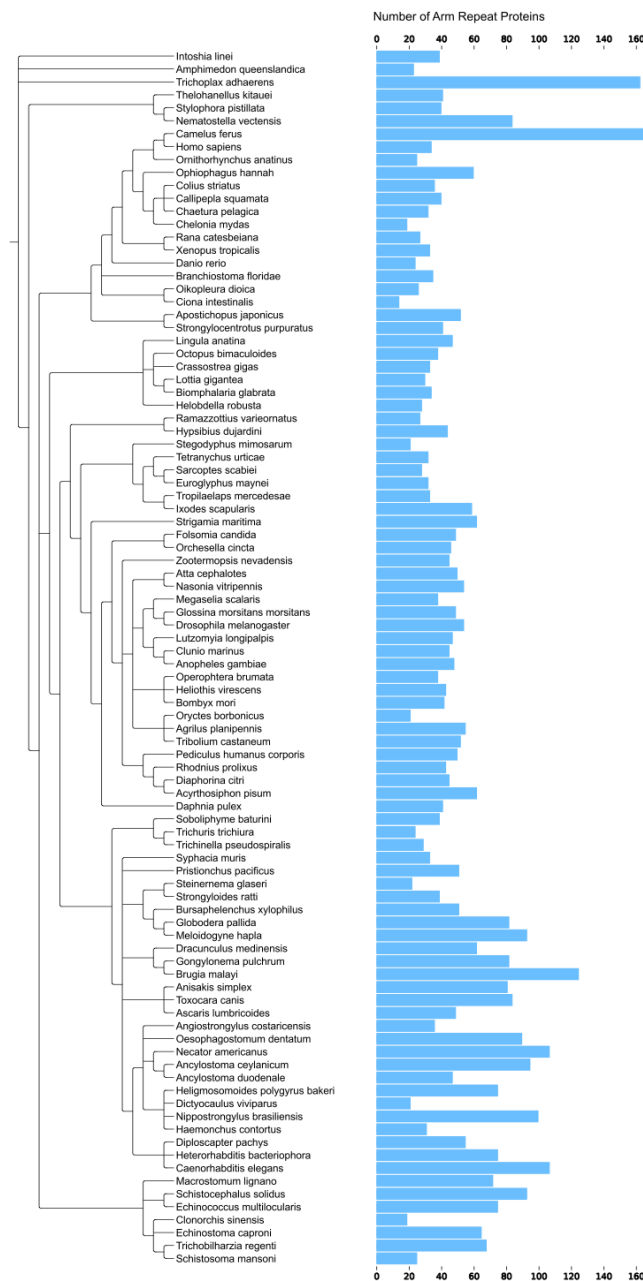

**Figure S1.** Prevalence of ArmRP members across metazoan species. The phylogenetic tree was generated by the NCBI CommonTree tool (<https://www.ncbi.nlm.nih.gov/Taxonomy/CommonTree/wwwcmt.cgi>).
